# Supplementary material for: New insight into the kinetic study on the different loadings of the CuO/CNT catalyst and its optimization for p-chloroaniline photodegradation
Source: Royal Society of Chemistry journal article supplement (doi:10.1039/d2na00216g), 2022-01-01
Supplement: d2na00216g1.pdf [file d2na00216g1.pdf]

## Supplementary Material

New insight of kinetics study on different loading CuO/CNT catalyst and its optimization for p-chloroaniline photodegradation

Nur Farahain binti Khusnun,<sup>a</sup> Aishah Abdul Jalil,<sup>a,b</sup> Arshad Ahmad,<sup>\* a,b</sup> Muhammad Ikram,<sup>\*c</sup> Nurul Sahida Hassan,<sup>a</sup> Walid Nabgan,<sup>a</sup> Mahadi Bahari,<sup>d</sup> Rafiziana Kasmani,<sup>a,b</sup> and Norafneeza Norazahar,<sup>a,b</sup>

<sup>a</sup> School of Chemical and Energy Engineering, Faculty of Engineering, Universiti Teknologi Malaysia, 81310 UTM Johor Bahru, Johor, Malaysia.

<sup>b</sup> Centre of Hydrogen Energy, Institute of Future Energy, Universiti Teknologi Malaysia, 81310 UTM Johor Bahru, Johor, Malaysia.

<sup>c</sup> Solar Cell Applications Research Lab, Department of Physics, Government College University Lahore, 54000, Punjab, Pakistan.

<sup>d</sup> Faculty of Science, Universiti Teknologi Malaysia, 81310 UTM Johor Bahru, Johor, Malaysia.

## Equations on mass transfer study

The Thiele Modulus equations used are as follow:

$$\varphi = R_p \sqrt{\frac{k_v}{D_{eff}}}$$

where

$R_p$  is the catalyst size (m),

$k_v$  is an apparent rate constant, and

$D_{eff}$  is the effective diffusion coefficient.

The effective diffusion coefficient can be obtained by equation below:

$$D_{eff} = \frac{\varepsilon}{\tau} D_{AB}$$

where

$D_{AB}$  is the diffusivity ( $D_{AB}$ ) m<sup>2</sup>/s

$\varepsilon$  is porosity of the catalyst

$\tau$  is tortuosity

The diffusivity can be obtained by equation below;

$$D_{AB} = (1.173 \times 10^{-16}) (\Phi M_B)^{1/2} \frac{T}{\mu_B V_A^{0.6}}$$

$$T = 1 - 0.5 \ln (1 - \varepsilon)$$

$\Phi$  is association parameter of solvent = 2.26

$M_B$  molecular weight of solvent = 18 kg/kmol

viscosity of solution ( $\mu_B$ ) = 0.00089 kg/m-s

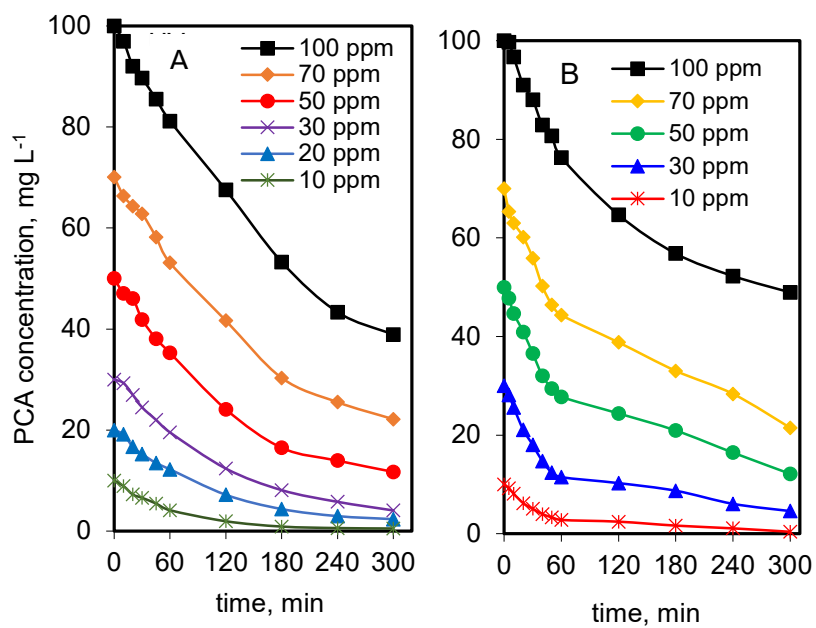

Fig S1. Effect of initial concentration for PCA degradation under A) UV and B) VIS irradiation.

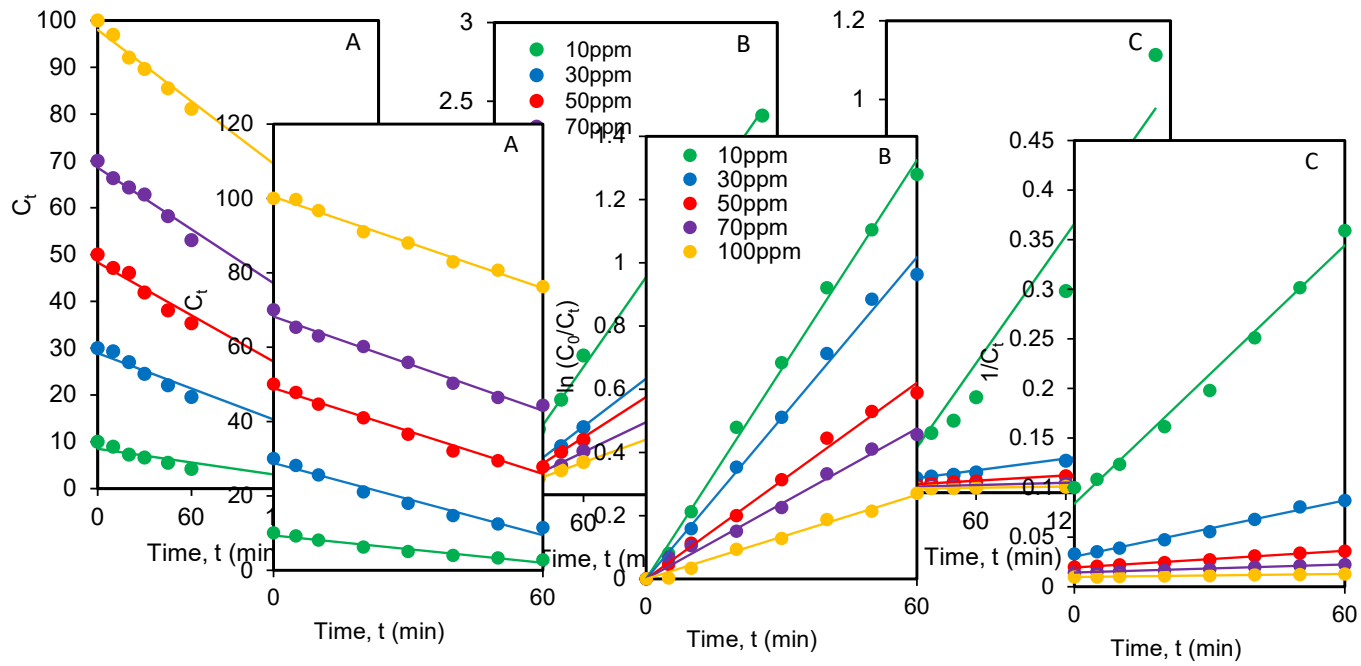

Fig S2. The linear plots of A) zeroth-order, B) first-order, C) second-order kinetics models under UV and D) zeroth-order, E) first-order, and F) second-order kinetics model under VIS systems

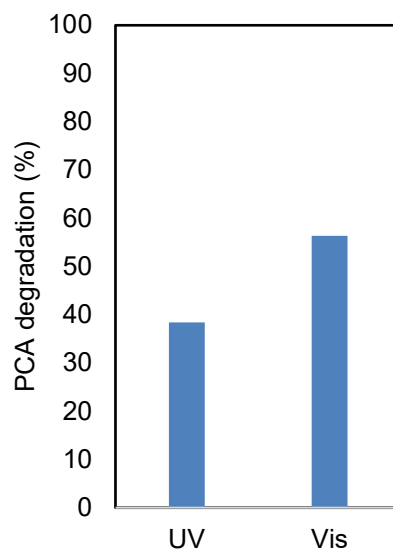

Fig. S3. PCA photodegradation performance over TiO<sub>2</sub> (Degussa P25) under both systems.

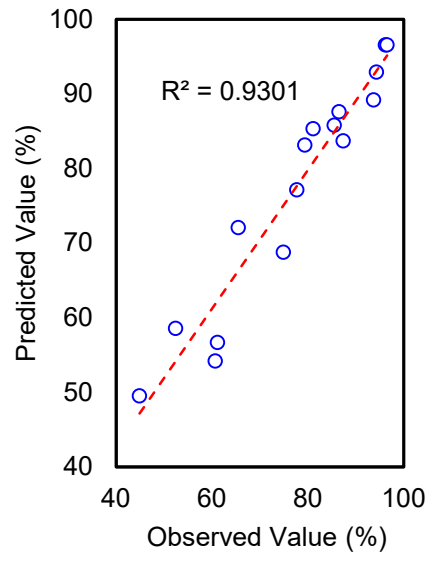

Fig. S4 Parity Chart

Table S1. Apparent rate constant and percentage degradation under UV and VIS light irradiation

| UV light irradiation        |                                                               |                |                                         |                |                                                                |                |                     |
|-----------------------------|---------------------------------------------------------------|----------------|-----------------------------------------|----------------|----------------------------------------------------------------|----------------|---------------------|
| initial concentration (ppm) | reaction order                                                |                |                                         |                |                                                                |                | PCA degradation (%) |
|                             | zeroth                                                        |                | first                                   |                | second                                                         |                |                     |
|                             | $k \times 10^{-2}$ (mol L <sup>-1</sup> . min <sup>-1</sup> ) | R <sup>2</sup> | $k \times 10^{-2}$ (min <sup>-1</sup> ) | R <sup>2</sup> | $k \times 10^{-2}$ (L. mol <sup>-1</sup> . min <sup>-1</sup> ) | R <sup>2</sup> |                     |
| 10                          | 4.87                                                          | 0.888          | 1.36                                    | 0.998          | 0.54                                                           | 0.926          | 96.3                |
| 30                          | 12.6                                                          | 0.966          | 0.72                                    | 0.997          | 0.05                                                           | 0.975          | 88.1                |
| 50                          | 18.8                                                          | 0.980          | 0.61                                    | 0.998          | 0.02                                                           | 0.976          | 80.3                |
| 70                          | 21.9                                                          | 0.996          | 0.45                                    | 0.993          | 0.01                                                           | 0.976          | 69.4                |
| 100                         | 25.4                                                          | 0.998          | 0.34                                    | 0.992          | 0.05                                                           | 0.986          | 66.2                |
| VIS light irradiation       |                                                               |                |                                         |                |                                                                |                |                     |
| initial concentration (ppm) | reaction order                                                |                |                                         |                |                                                                |                | PCA degradation (%) |
|                             | zeroth                                                        |                | first                                   |                | second                                                         |                |                     |
|                             | $k \times 10^{-2}$                                            | R <sup>2</sup> | $k \times 10^{-2}$                      | R <sup>2</sup> | $k \times 10^{-2}$                                             | R <sup>2</sup> |                     |
| 10                          | 12.3                                                          | 0.998          | 2.21                                    | 0.996          | 0.43                                                           | 0.986          | 96.8                |
| 30                          | 32.4                                                          | 0.995          | 1.70                                    | 0.984          | 0.09                                                           | 0.989          | 84.7                |
| 50                          | 38.5                                                          | 0.993          | 1.03                                    | 0.987          | 0.03                                                           | 0.994          | 75.7                |
| 70                          | 42.2                                                          | 0.970          | 0.79                                    | 0.989          | 0.01                                                           | 0.988          | 69.3                |
| 100                         | 41.0                                                          | 0.955          | 0.44                                    | 0.990          | 0.005                                                          | 0.993          | 51.0                |

Table S2 Initial rates and photonic efficiency for 2M methanol oxidation

| Catalyst       | $k_{app}$ ,<br>( $\text{min}^{-1}$ ) | Rate, $r_0$<br>( $\text{mmol L}^{-1} \text{s}^{-1}$ ) | Photonic efficiency, $\Phi$<br>(%) |
|----------------|--------------------------------------|-------------------------------------------------------|------------------------------------|
| 3 wt% CuO/CNT  | 0.0132                               | 4.40E-07                                              | 0.028                              |
| 50 wt% CuO/CNT | 0.0268                               | 8.93E-07                                              | 0.026                              |



Table S3 Experimental design and response value for different conditions

| Run | Independent variables |                     |                           | Response (Y) |           |
|-----|-----------------------|---------------------|---------------------------|--------------|-----------|
|     | pH (A)                | Catalyst dosage (B) | Initial concentration (C) | Observed     | Predicted |
| 1   | 3                     | 0.125               | 5                         | 60.7         | 54.19     |
| 2   | 3                     | 0.125               | 15                        | 52.4         | 58.58     |
| 3   | 3                     | 0.625               | 5                         | 44.9         | 49.50     |
| 4   | 3                     | 0.625               | 15                        | 87.4         | 83.69     |
| 5   | 11                    | 0.125               | 5                         | 79.4         | 83.17     |
| 6   | 11                    | 0.125               | 15                        | 61.2         | 56.66     |
| 7   | 11                    | 0.625               | 5                         | 74.9         | 68.78     |
| 8   | 11                    | 0.625               | 15                        | 65.5         | 72.07     |
| 9   | 3                     | 0.375               | 10                        | 77.7         | 77.14     |
| 10  | 11                    | 0.375               | 10                        | 85.5         | 85.82     |
| 11  | 7                     | 0.125               | 10                        | 86.5         | 87.60     |
| 12  | 7                     | 0.625               | 10                        | 94.3         | 92.96     |
| 13  | 7                     | 0.375               | 5                         | 81.1         | 85.36     |
| 14  | 7                     | 0.375               | 15                        | 93.7         | 89.20     |
| 15  | 7                     | 0.375               | 10                        | 96.2         | 96.60     |
| 16  | 7                     | 0.375               | 10                        | 96.5         | 96.60     |

Table S4 Analysis of Variance (ANOVA) for Quadratic Model

| Sources                      | Sum of<br>Square<br>(SS) | Degree of<br>Freedom<br>(DoF) | Mean<br>Square<br>(MS) | F-value  | F <sub>0.05</sub> |
|------------------------------|--------------------------|-------------------------------|------------------------|----------|-------------------|
| (1) pH (L)                   | 188.356                  | 1                             | 188.3560               | 4.14069  | 0.088068          |
| pH (Q)                       | 602.903                  | 1                             | 602.9031               | 13.25380 | 0.010827          |
| (2) Catalyst Dosage(L)       | 71.824                   | 1                             | 71.8240                | 1.57893  | 0.255620          |
| Catalyst Dosage(Q)           | 105.383                  | 1                             | 105.3831               | 2.31667  | 0.178818          |
| (3) Initial concentration(L) | 36.864                   | 1                             | 36.8640                | 0.81039  | 0.402688          |
| Initial concentration(Q)     | 229.120                  | 1                             | 229.1195               | 5.03680  | 0.065958          |
| 1L by 2L                     | 47.045                   | 1                             | 47.0450                | 1.03420  | 0.348413          |
| 1L by 3L                     | 477.405                  | 1                             | 477.4050               | 10.49494 | 0.017696          |
| 2L by 3L                     | 444.020                  | 1                             | 444.0200               | 9.76103  | 0.020473          |
| Residual                     | 272.934                  | 6                             | 45.4891                |          |                   |
| Total SS                     | 3906.174                 | 15                            |                        |          |                   |
